# Supplementary material
Source: PubMed Central journal article supplement (PMC3406177)
Supplement: NIHMS390671-supplement-01.pdf [file NIHMS390671-supplement-01.pdf]

## Supporting Information: DNA damage by C1027 involves hydrogen atom abstraction and addition to nucleobases

Joanna Maria N. San Pedro<sup>a</sup>, Terry A. Beerman<sup>b</sup>, and Marc M. Greenberg<sup>a\*</sup>

<sup>a</sup>*Department of Chemistry, Johns Hopkins University, 3400 N. Charles St., Baltimore, MD 21218*

<sup>b</sup>*Department of Pharmacology and Therapeutics, Roswell Park Cancer Institute, Buffalo, NY 14263*

### Contents:

1. **Supporting Information Figure 1.** Glass tube used for degassing DNA samples. (S2)
2. **Supporting Information Figure 2.** Reactivity of isolated ICL from <sup>32</sup>P-**1a** (top strand labeled). (S3)
3. **Supporting Information Figure 3.** Reactivity of isolated ICL from <sup>32</sup>P-**1a** (bottom strand labeled). (S4)
4. **Supporting Information Figure 4.** Reactivity of isolated ICL from <sup>32</sup>P-**1g** (top strand labeled). (S5)
5. **Supporting Information Figure 5.** Reactivity of isolated ICL from <sup>32</sup>P-**1g** (bottom strand labeled). (S6)
6. **Supporting Information Figure 6.** Reactivity of crude ICL from <sup>32</sup>P-**1a** (top strand labeled). (S7)
7. **Supporting Information Figure 7.** Reactivity of crude ICL from <sup>32</sup>P-**1a** (bottom strand labeled). (S8)
8. **Supporting Information Figure 8.** Reactivity of crude ICL from <sup>32</sup>P-**1g** (top strand labeled). (S9)
9. **Supporting Information Figure 9.** Reactivity of crude ICL from <sup>32</sup>P-**1g** (bottom strand labeled). (S10)
10. **Supporting Information Figure 10.** Representative hydroxyl radical cleavage gel of ICL from **1a** (bottom strand). (S11)

---

\* Corresponding author. Tel.: +0-410-516-8095; fax: +0-410-516-7044; e-mail: mgreenberg@jhu.edu

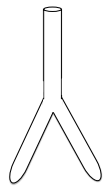

**Supporting Information Figure 1.** Glass tube used for degassing DNA samples. (Glass tubes were made by MD Scientific Glass Corp)

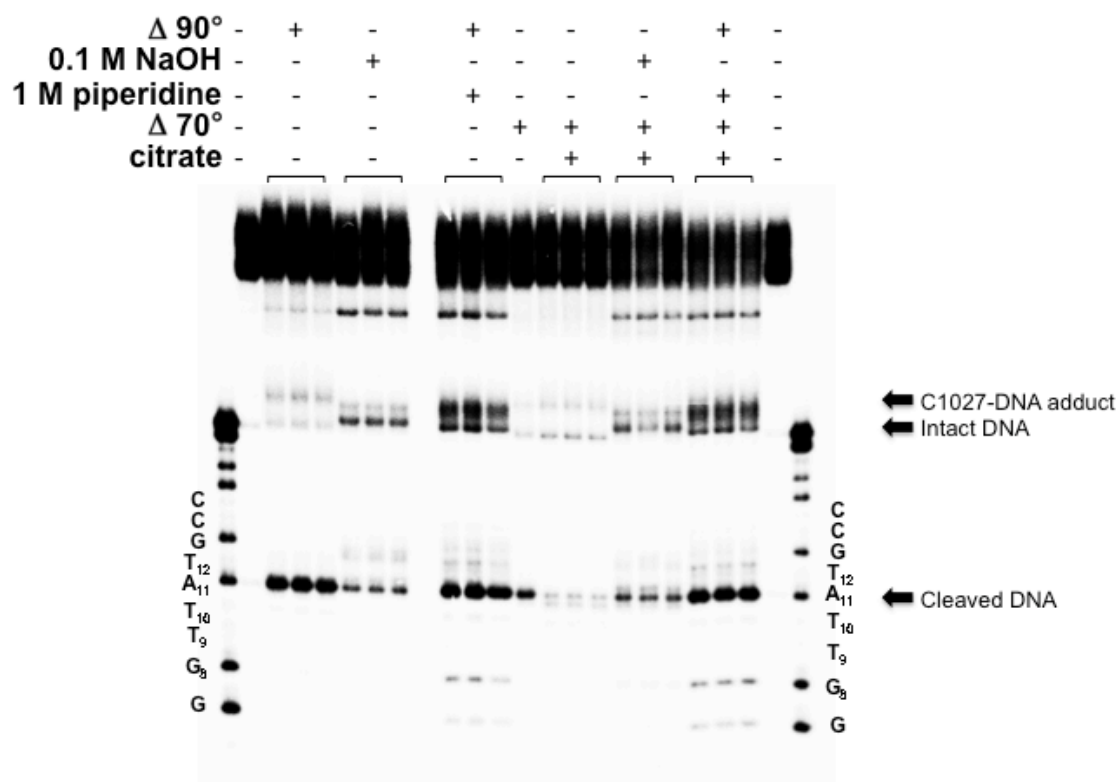

Supporting Information Figure 2. Reactivity of isolated ICL from <sup>32</sup>P-1a (top strand labeled).

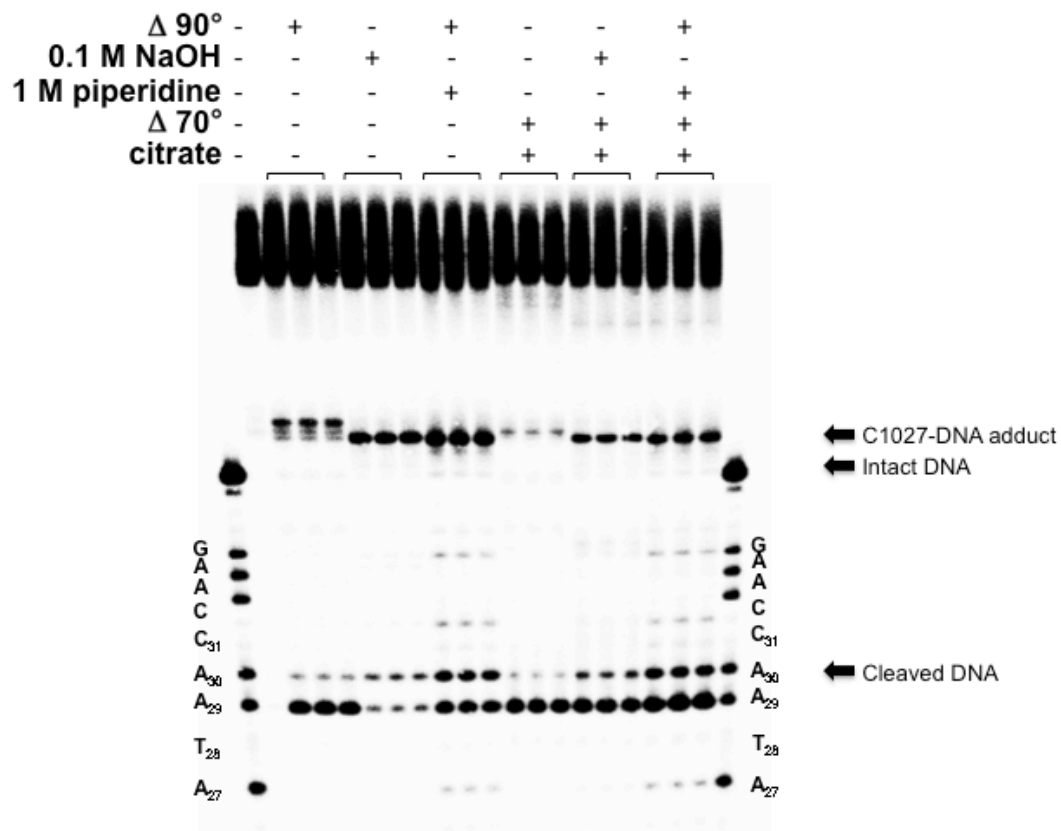

**Supporting Information Figure 3.** Reactivity of isolated ICL from <sup>32</sup>P-1a (bottom strand labeled).

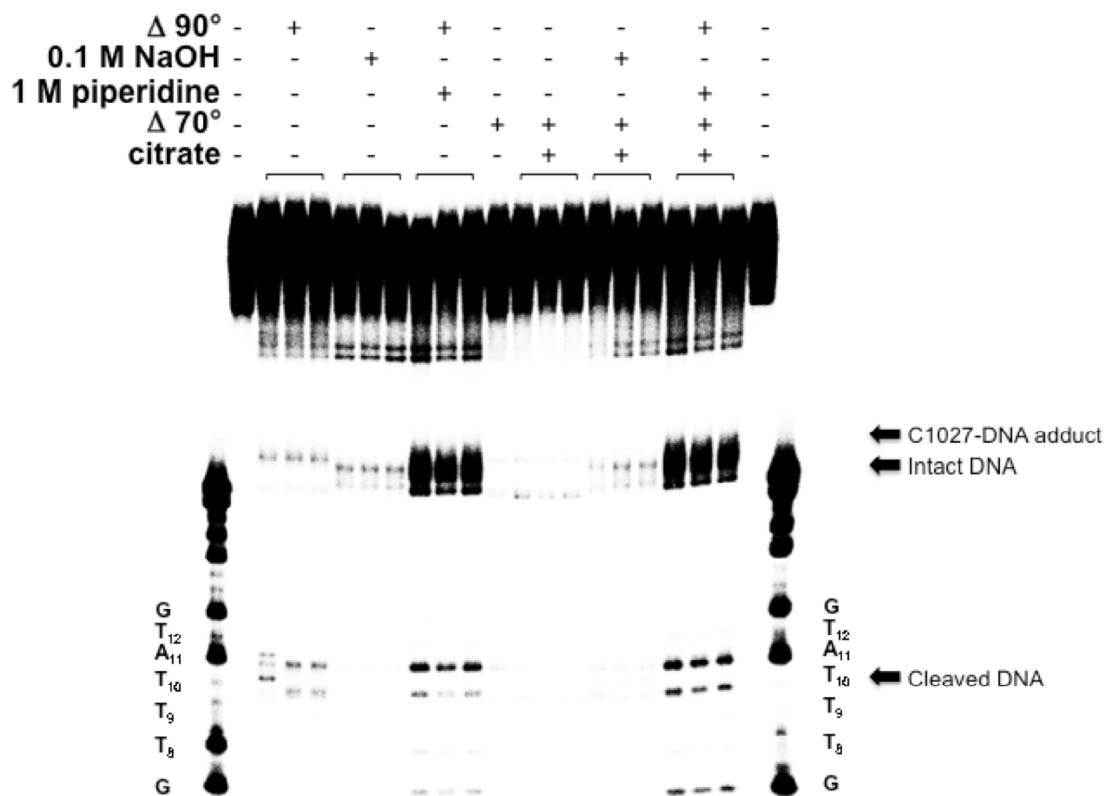

Supporting Information Figure 4. Reactivity of isolated ICL from  $^{32}\text{P}$ -**1g** (top strand labeled).

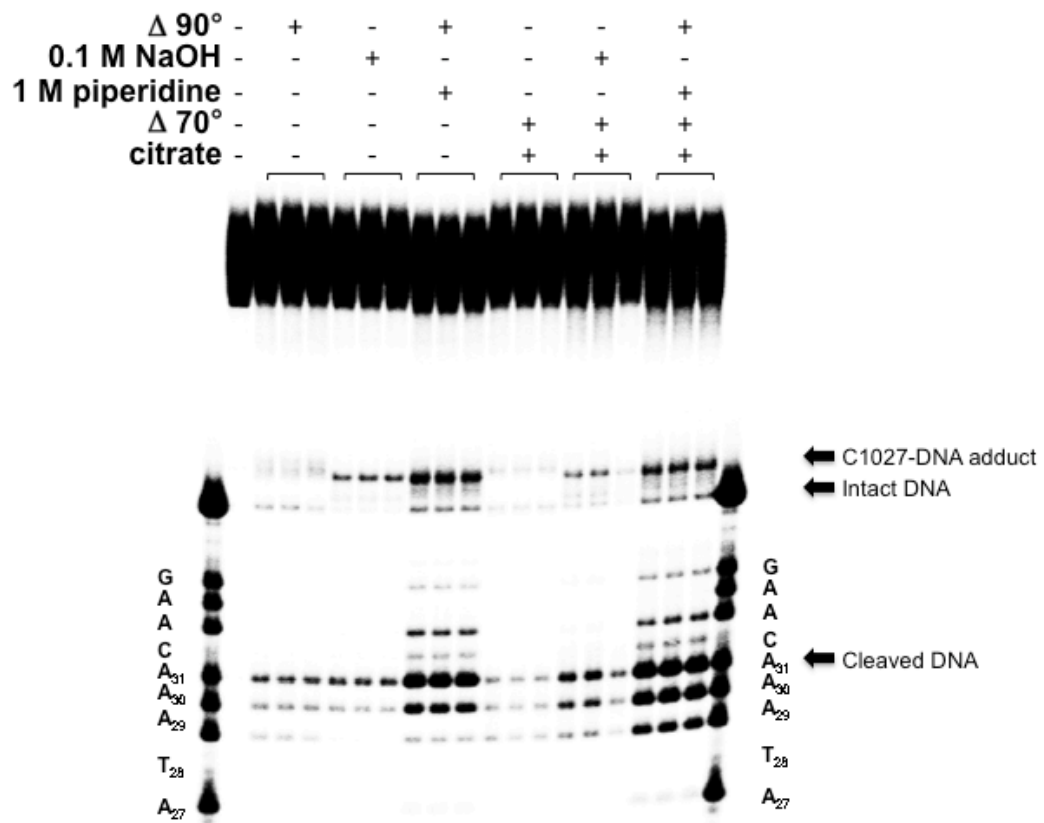

**Supporting Information Figure 5.** Reactivity of isolated ICL from  $^{32}\text{P}$ -1g (bottom strand labeled).

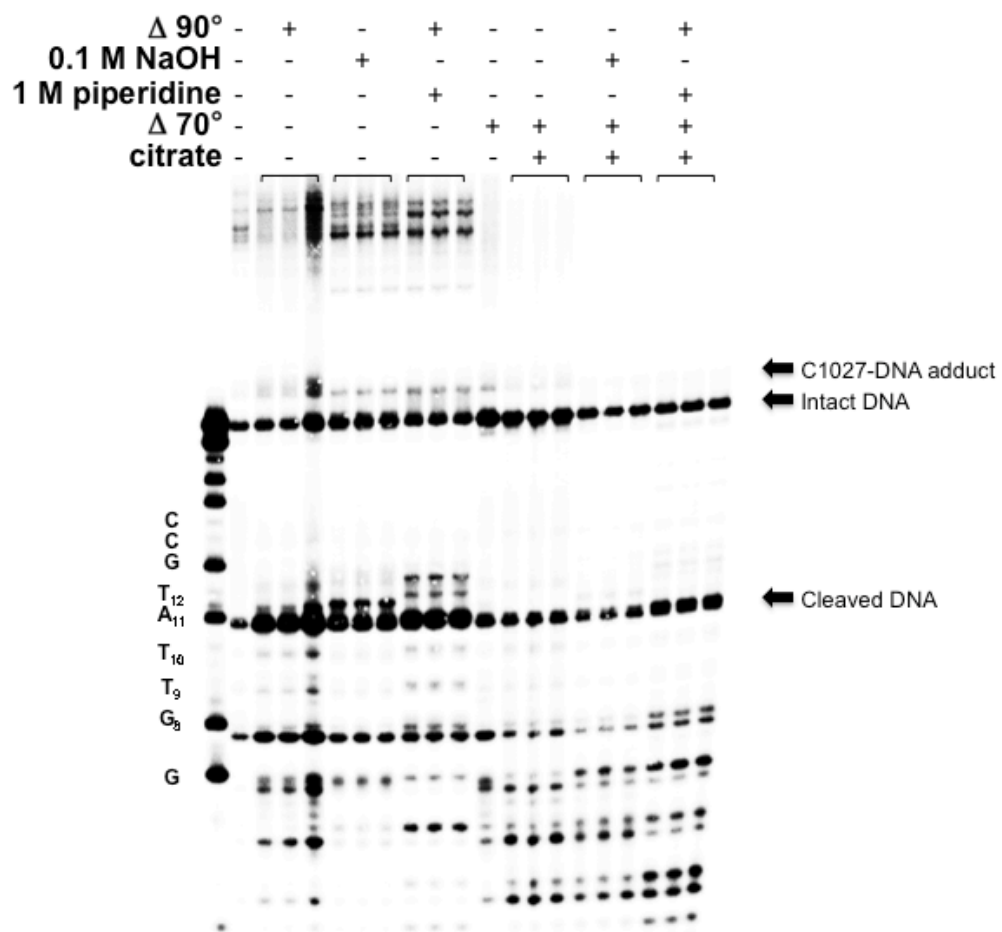

**Supporting Information Figure 6.** Reactivity of crude ICL from <sup>32</sup>P-1a (top strand labeled).

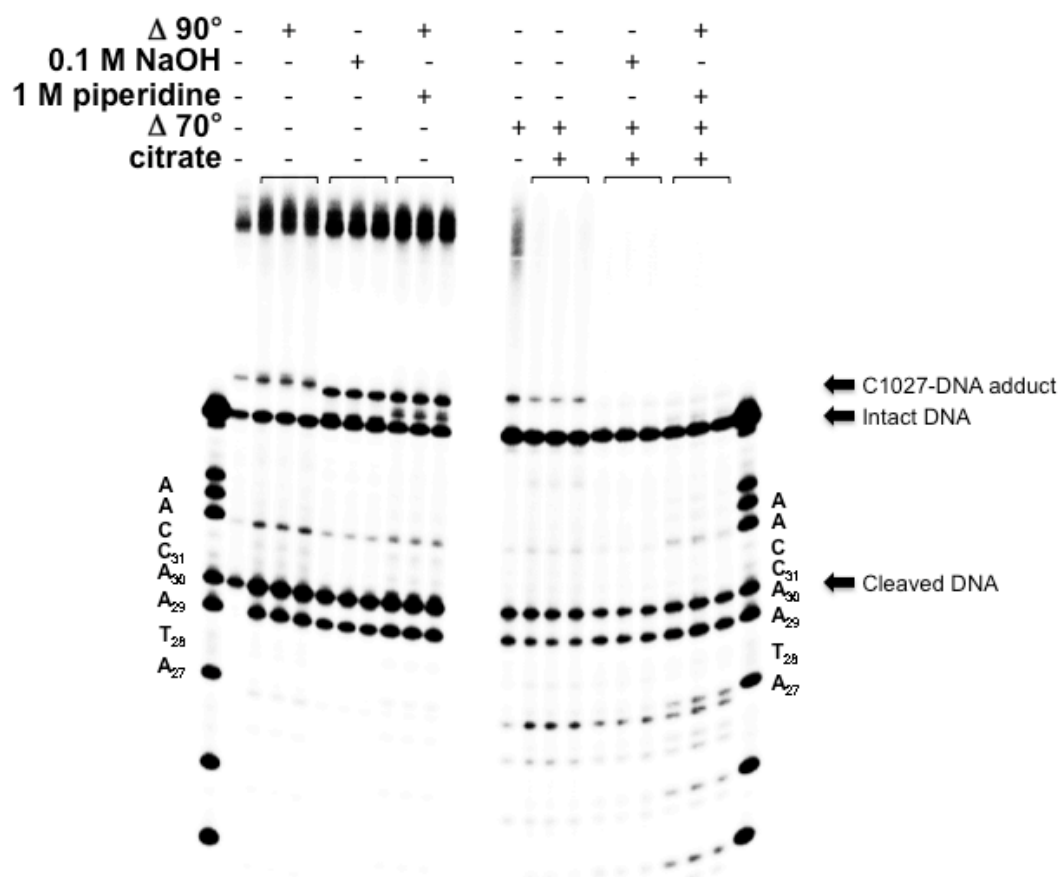

Supporting Information Figure 7. Reactivity of crude ICL from <sup>32</sup>P-1a (bottom strand labeled).



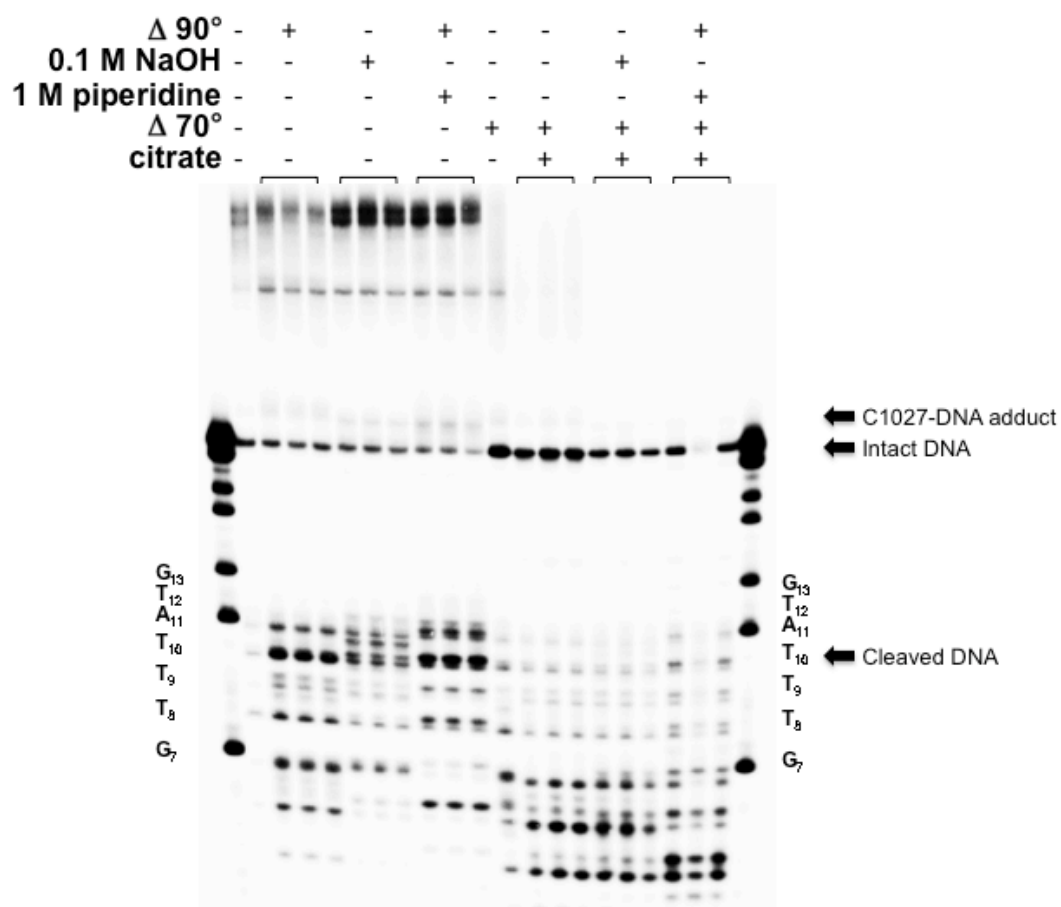

**Supporting Information Figure 8.** Reactivity of crude ICL from  $^{32}\text{P}$ -1g (top strand labeled).

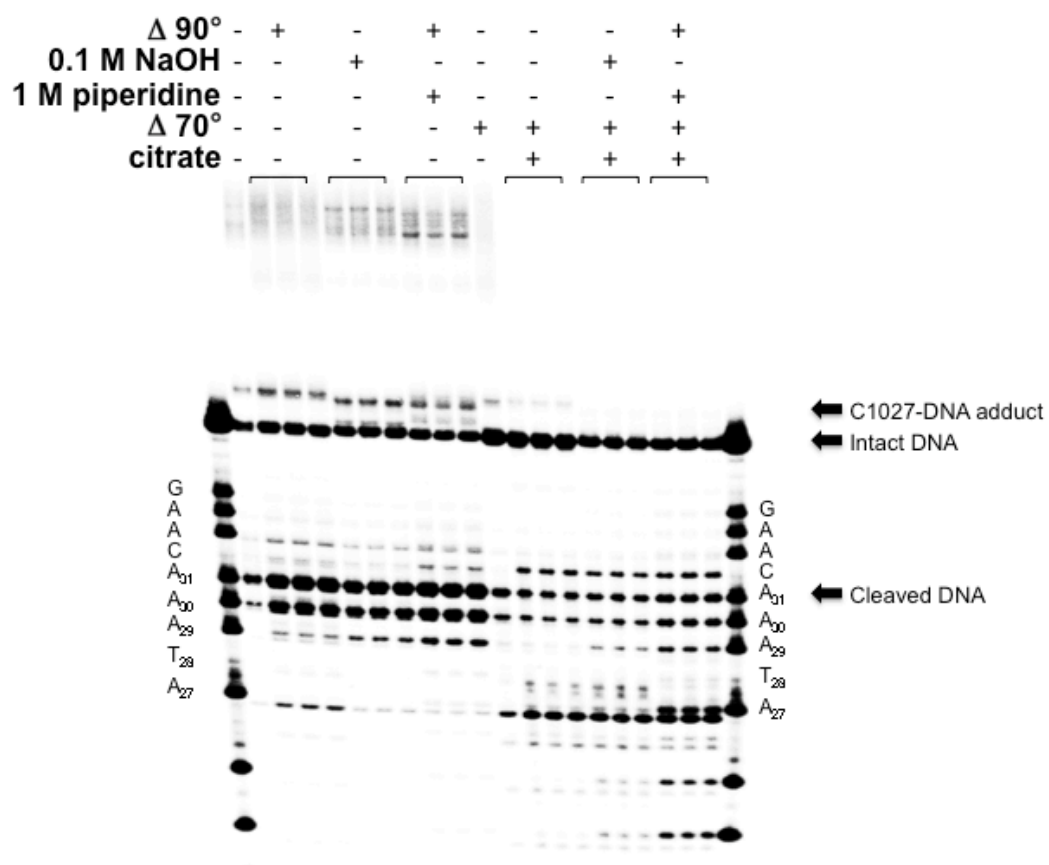

Supporting Information Figure 9. Reactivity of crude ICL from  $^{32}\text{P}$ -1g (bottom strand labeled).

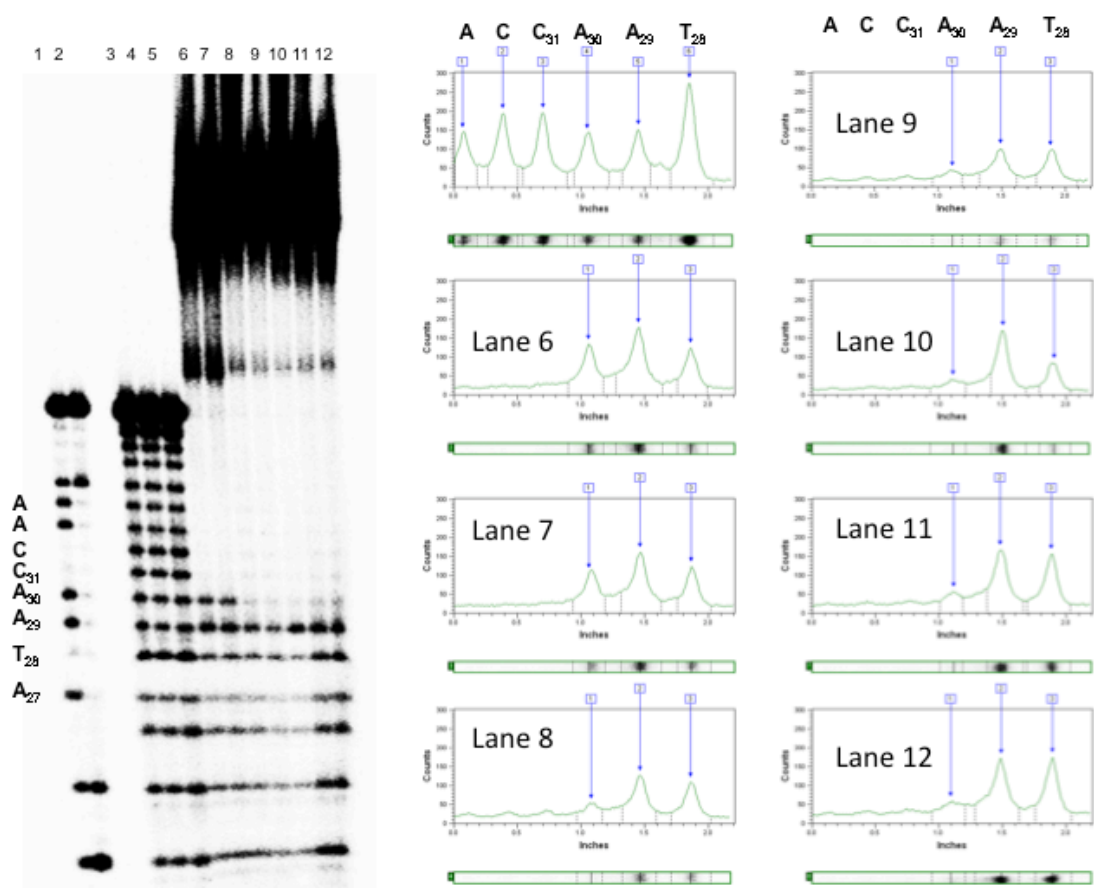

Lane 1, A + G sequencing reaction; Lane 2, G sequencing reaction; Lanes 3-5, •OH treated ss intact DNA control, Lanes 6-12, •OH treated ICL; Lanes 6-7, bottom ICL; Lanes 8-9, middle ICL; Lanes 10-12, top ICL.

**Supporting Information Figure 10.** Representative hydroxyl radical cleavage gel of ICL from **1a** (bottom strand).
